# Supplementary material
Source: Springer Nature journal article supplement (https://www.springermedizin.de/resource/supplementary/12958_2012_986_MOESM5_ESM.pdf/9566548)

a

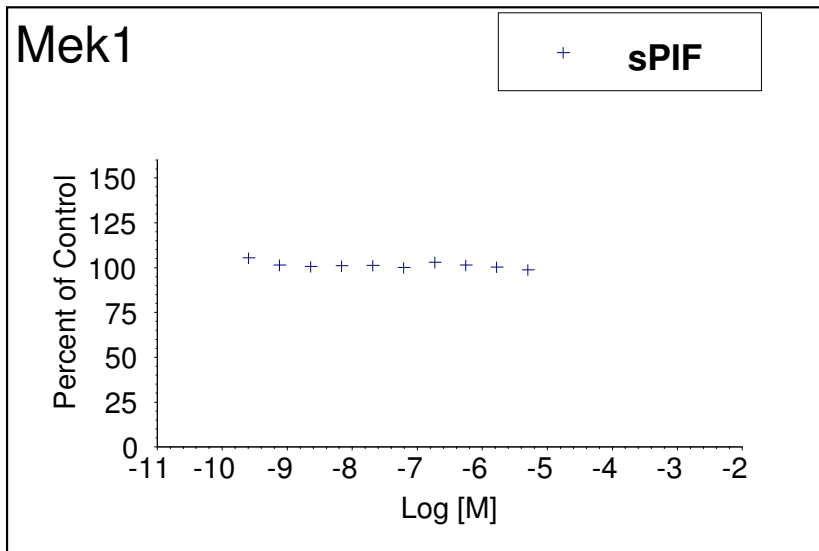

b

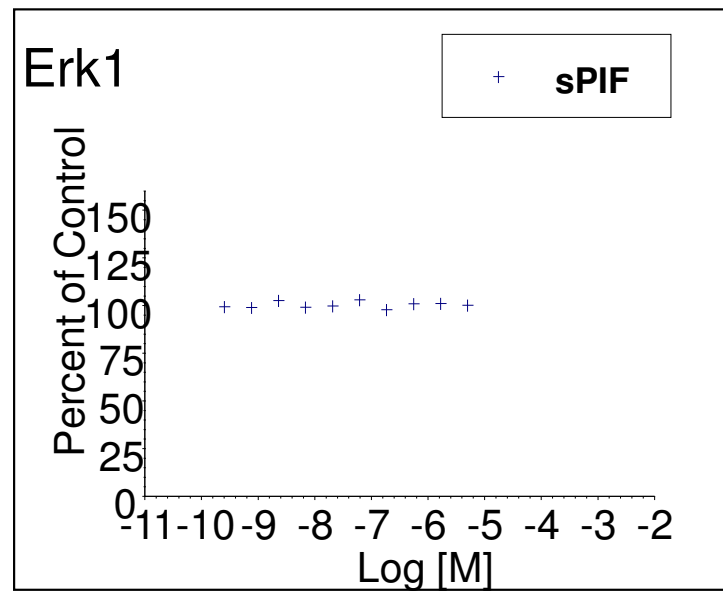

c

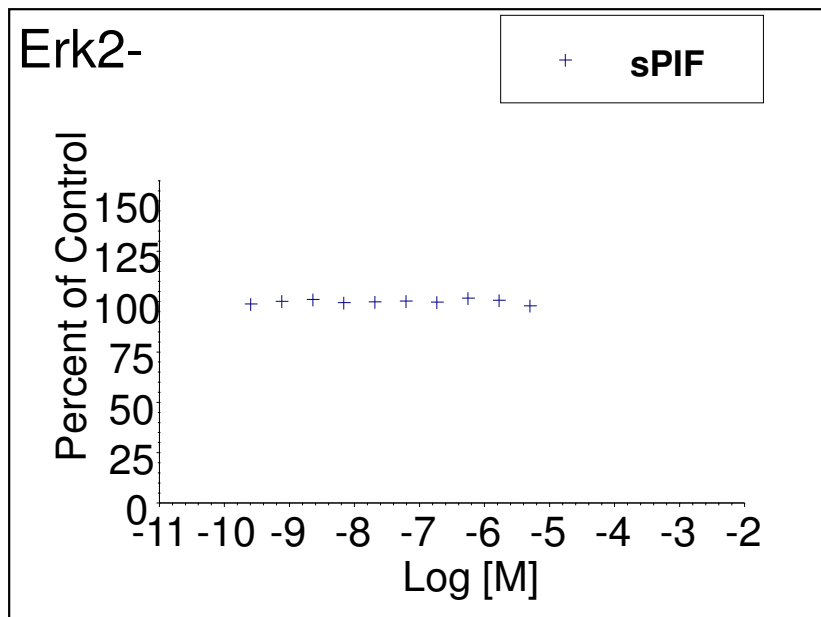

d

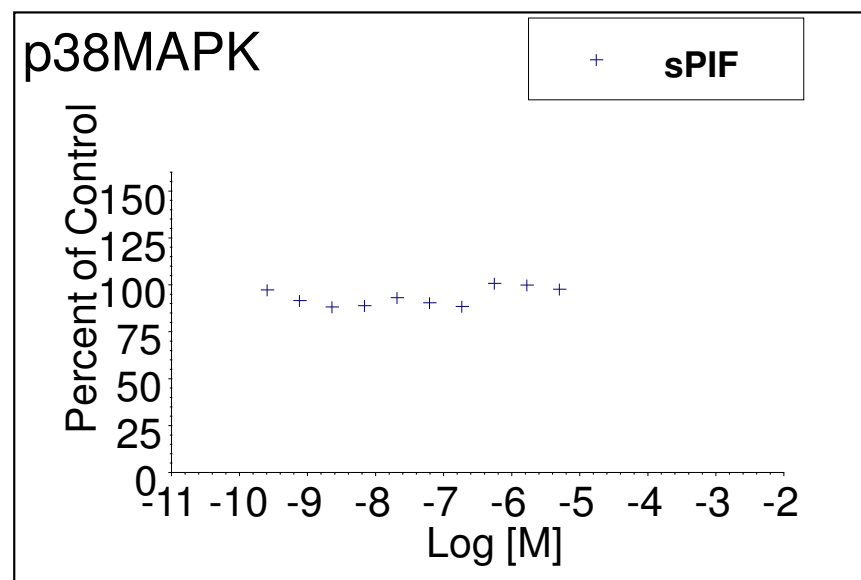

Supplement: MOESM5 [file 9566548]
